# Supplementary material
Source: PubMed Central journal article supplement (PMC3113369)
Supplement: es2007462_si_001.pdf [file es2007462_si_001.pdf]

## Supporting Information

### Identification of Flame Retardants in Polyurethane Foam Collected from Baby Products

Heather M. Stapleton<sup>1</sup>, Susan Klosterhaus<sup>2</sup>, Alex Keller<sup>1</sup>, P. Lee Ferguson<sup>1</sup>, Saskia van Bergen<sup>3</sup>, Ellen Cooper<sup>1</sup>, Thomas F. Webster<sup>4</sup> and Arlene Blum<sup>5</sup>

1- Nicholas School of the Environment, Duke University, Durham, NC, USA;

2- San Francisco Estuary Institute, Oakland, CA, USA;

3- East Bay Municipal Utility District, Oakland, CA, USA;

4- Department of Environmental Health, Boston University School of Public Health, Boston, MA, USA;

5- Department of Chemistry, University of California, and Green Science Policy Institute, Berkeley, CA, USA;

\*corresponding author: [heather.stapleton@duke.edu](mailto:heather.stapleton@duke.edu)

This section contains additional information supportive of our study. Table S1 includes a detailed list of all 101 products analyzed in this study, including information on product type, flame retardants detected, estimated year of purchase, state product was donated from, if the product was a hand-me-down or not, and whether the product was known to contain a specific California flammability standard label. Figure S1 displays results from the LC/HRMS MS/MS analysis of a foam extract containing a previously unidentified chlorinated organophosphate flame retardant which we refer to as “U-OPFR”. Figure S2 is a proposed fragmentation pattern to support our identification of U-OPFR based on ion clusters observed in Figure S1.

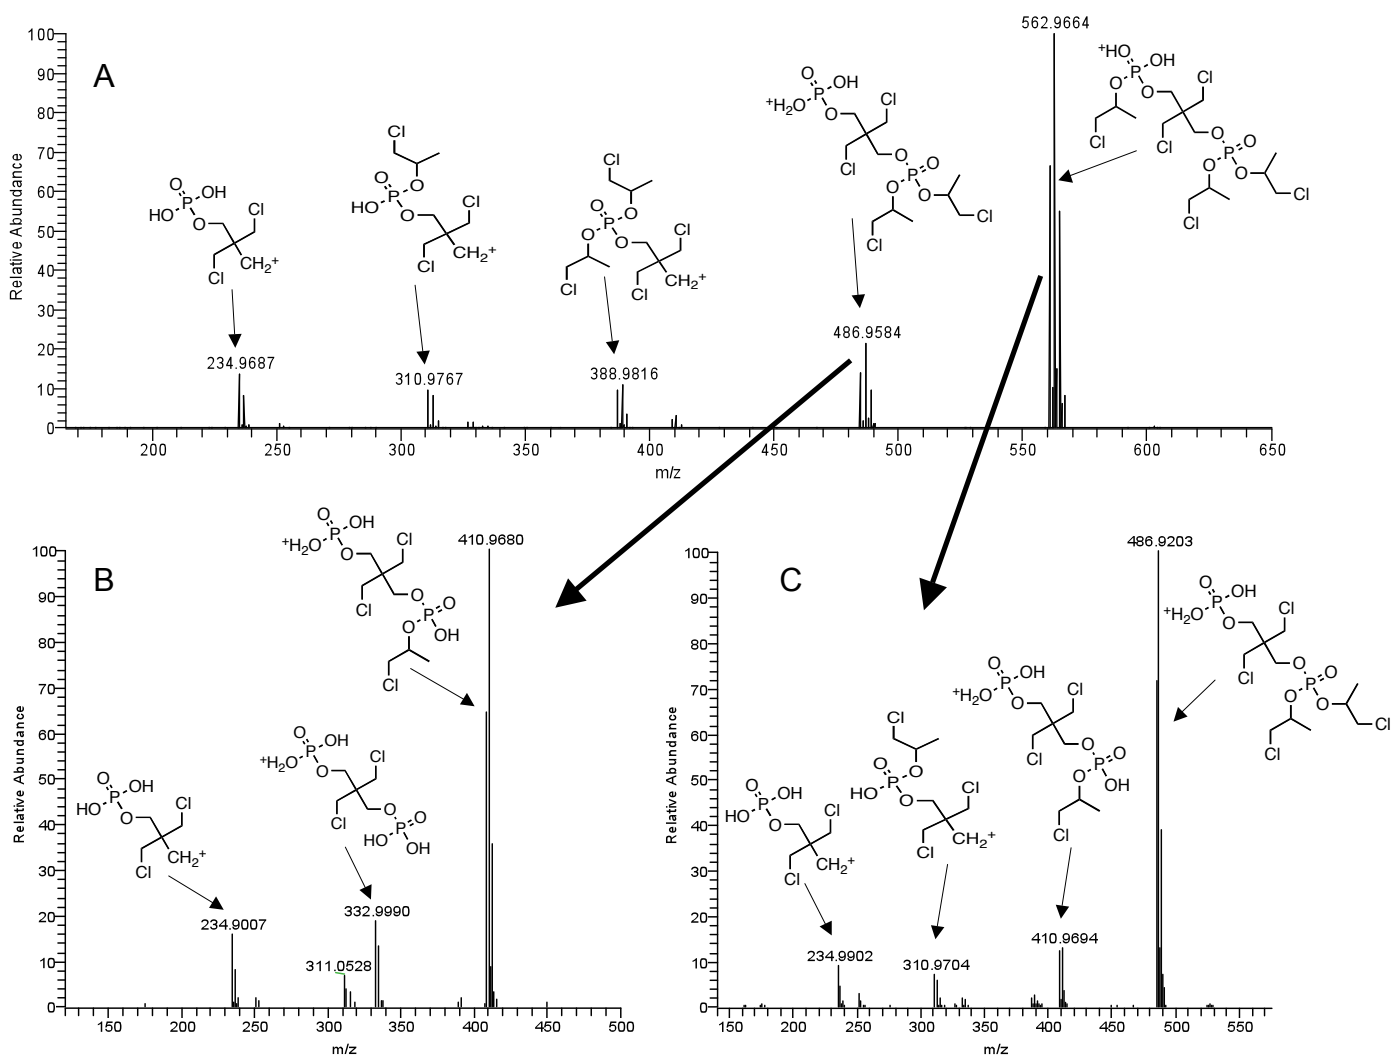

**Figure S1:** High-resolution collision-induced dissociation (CID) MS/MS product ion spectrum (A) of the  $[M+H]^+$  ion ( $m/z = 636.9774$ ) from the putative 2,2-bis(chloromethyl)propane-1,3-diyl tetrakis(1-chloropropan-2-yl) bis(phosphate) organophosphate flame retardant compound, showing major fragment ions and proposed structures. Also shown are low resolution (LTQ) CID  $MS^3$  product ion spectra obtained from two prominent MS/MS product ions 484.962 (B) and 560.970 (C), with major fragment ions identified and proposed structures assigned accordingly. All spectra were obtained from HPLC-APCI-MS analyses of a sample of foam taken from an infant changing table pad.

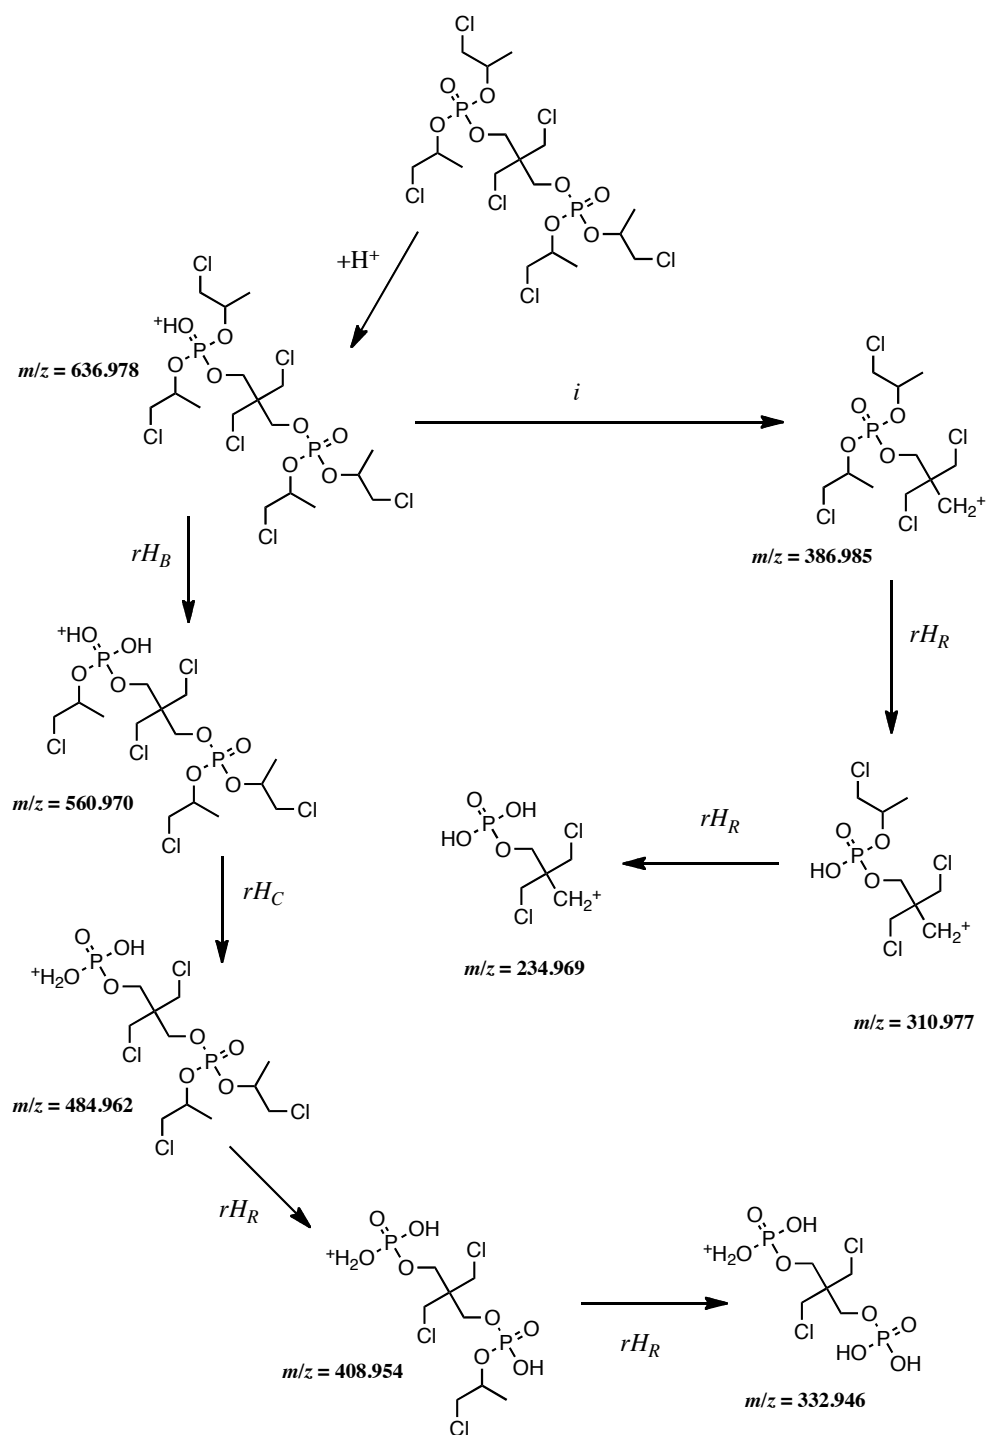

**Figure S2:** Proposed fragmentation mechanisms and associated structures corresponding to CID MS/MS and MS<sup>3</sup> spectra of putative 2,2-bis(chloromethyl)propane-1,3-diyl tetrakis(1-chloropropan-2-yl) bis(phosphate) organophosphate flame retardant compound, derived from spectra shown in Figure S1. Reaction nomenclature is denoted as:  $i$  (inductive cleavage),  $rH_B$  (alpha, beta-charge site rearrangement),  $rH_C$  (gamma-charge site rearrangement), and  $rH_R$  (charge-remote fragmentation).

| Sample # | Product Type                                        | Flame retardants Detected (in order of relative abundance) | Year purchased           | State From Which Sample Donated | Product a "Hand me Down"? | Label Attached Indicating CA Flammability Test?                                                                                 |
|----------|-----------------------------------------------------|------------------------------------------------------------|--------------------------|---------------------------------|---------------------------|---------------------------------------------------------------------------------------------------------------------------------|
| 1        | Nursing pillow                                      | V6, TCEP, TCP                                              |                          | California                      | no                        | 117                                                                                                                             |
| 2        | Changing table pad                                  | U-OPFR, TCP                                                | estimated 2008           | California                      | yes                       | 117                                                                                                                             |
| 3        | car seat                                            | PentaBDE, TPP                                              | estimated 2000           | California                      | yes                       | 117                                                                                                                             |
| 4        | high chair                                          | No Detects                                                 | 2005                     | California                      | no                        | 117                                                                                                                             |
| 5        | stroller/bassinnet                                  | No Detects                                                 | 2005                     | California                      | no                        | no (confirmed)                                                                                                                  |
| 6        | car seat (from head support)                        | TDCPP                                                      | 2007                     | California                      | no                        | no (confirmed)                                                                                                                  |
| 7        | Changing table pad                                  | Unidentified Peaks Present                                 | 2006                     | California                      | no                        | 117                                                                                                                             |
| 8        | portable crib mattress                              | FM550                                                      | 2004                     | California                      | yes                       | 117                                                                                                                             |
| 9        | car seat (insert for smaller child)                 | TCPP, TDCPP                                                | 2008                     | California                      | no                        | no (confirmed)                                                                                                                  |
| 10       | car seat (insert for smaller child)                 | TDCPP                                                      | 2007                     | California                      | no                        | no (confirmed)                                                                                                                  |
| 11       | high chair pad (headrest)                           | TDCPP                                                      | 2003                     | California                      | no                        | Not sure because took off labels after purchasing                                                                               |
| 12       | portable crib mattress (sleeping pad)               | PentaBDE, TPP                                              | 2007                     | California                      | yes                       | Not sure because took off labels after purchasing                                                                               |
| 13       | portable crib/co-sleeper                            | V6, TCEP                                                   | 2006                     | California                      | yes                       | 117                                                                                                                             |
| 14       | baby walker                                         | TDCPP                                                      | 2004-2005                | California                      | yes                       | 117                                                                                                                             |
| 15       | Nursing pillow                                      | V6, TCEP                                                   | 2006                     | California                      | yes                       | 117                                                                                                                             |
| 16       | Nursing pillow                                      | V6, TCEP                                                   | 2008                     | Washington, DC                  | no                        | 117                                                                                                                             |
| 17       | Changing pad                                        | U-OPFR, TCP                                                | 2008                     | Washington, DC                  | no                        | 117                                                                                                                             |
| 18       | baby carrier                                        | No Detects                                                 | 2007                     | California                      | yes                       | no (confirmed)                                                                                                                  |
| 19       | baby carrier                                        | TDCPP                                                      | 2008                     | California                      | no                        | no (confirmed)                                                                                                                  |
| 20       | Changing pad                                        | TDCPP                                                      | 2009                     | California                      | no                        | 117                                                                                                                             |
| 21       | rocking chair/glider                                | TPP - looks like Supresta mixture AC073                    | 2006                     | Nevada                          | no                        | 117                                                                                                                             |
| 22       | baby carrier                                        | No Detects                                                 | 2007                     | Nevada                          | no                        | no (confirmed)                                                                                                                  |
| 23       | portable crib mattress                              | FM550/600                                                  | 2006                     | Nevada                          | no                        | 117 and 603                                                                                                                     |
| 24       | sleeping wedge                                      | TDCPP                                                      | 2006                     | Nevada                          | no                        | 117                                                                                                                             |
| 25       | baby tub padded insert                              | No Detects                                                 | 2002 or 2003             | New Mexico                      | yes                       | 116 and 117                                                                                                                     |
| 26       | rocking chair cushion (not a baby chair; FM550/600) | FM550/600                                                  | 2009                     | California                      | no                        | 117                                                                                                                             |
| 27       | bassinnet mattress                                  | TDCPP                                                      | 2006                     | California                      | no                        | no (confirmed)                                                                                                                  |
| 28       | baby carrier                                        | No Detects                                                 | 2006                     | California                      | no                        | no (confirmed)                                                                                                                  |
| 29       | car seat                                            | FM550/600                                                  | 2006                     | California                      | no                        | no (confirmed)                                                                                                                  |
| 30       | baby carrier                                        | V6, TCEP                                                   | 2008                     | Arizona                         | Not available             | no                                                                                                                              |
| 31       | car seat                                            | TDCPP                                                      | 2006                     | Colorado                        | Not available             | 117                                                                                                                             |
| 32       | car seat                                            | TDCPP                                                      | 2006                     | Colorado                        | Not available             | 117                                                                                                                             |
| 33       | nursing pillow                                      | V6, TCEP                                                   | 2006                     | Colorado                        | yes                       | 117                                                                                                                             |
| 34       | glider rocker                                       | TDCPP                                                      | 2006                     | Colorado                        | Not available             | 117                                                                                                                             |
| 35       | portable crib mattress (sleeping pad)               | TDCPP                                                      | <10 (maybe 20) years old | Colorado                        | Not available             | no                                                                                                                              |
| 36       | Changing table pad                                  | TDCPP                                                      | 2006                     | California                      | Not available             | 116 and 117                                                                                                                     |
| 37       | car seat                                            | TCPP, TDCPP, TCEP                                          | 2007                     | California                      | no                        | no                                                                                                                              |
| 38       | changing table pad                                  | FM550/600 and PentaBDE                                     | 2002                     | Nevada                          | yes                       | 116 and 117                                                                                                                     |
| 39       | changing table pad                                  | U-OPFR, TCP                                                | 2009                     | North Carolina                  | no                        | 117 and 117                                                                                                                     |
| 40       | car seat (headrest)                                 | TDCPP                                                      | 2009                     | North Carolina                  | no                        | 117                                                                                                                             |
| 41       | portable crib mattress                              | FM550/600                                                  | 2009                     | North Carolina                  | no                        | 603                                                                                                                             |
| 42       | nursing pillow                                      | V6, TCEP                                                   | 2005                     | North Carolina                  | yes                       | 117                                                                                                                             |
| 43       | portable crib mattress (Moses basket)               | Unidentified Peaks Present                                 | 2005                     | Not Available                   | yes                       | no                                                                                                                              |
| 44       | changing table pad                                  | TDCPP                                                      | 2006                     | Not Available                   | yes                       | 117                                                                                                                             |
| 45       | car seat                                            | FM550/600                                                  | 2008                     | Not Available                   | yes                       | no                                                                                                                              |
| 46       | nursing pillow                                      | V6, TCEP                                                   | 2006                     | Not Available                   | Not available             | 117                                                                                                                             |
| 47       | car seat                                            | FM550/600                                                  | 2006                     | Not Available                   | Not available             | 117                                                                                                                             |
| 48       | sleeping wedge                                      | TDCPP                                                      | 2010                     | Michigan                        | Not available             | 117                                                                                                                             |
| 49       | sleeping wedge                                      | Unidentified Peaks Present                                 | 2010                     | Michigan                        | Not available             | 603                                                                                                                             |
| 50       | changing table pad                                  | TDCPP                                                      | 2010                     | Michigan                        | Not available             | 117                                                                                                                             |
| 51       | sleeping wedge                                      | Unidentified Peaks Present                                 | 2010                     | Michigan                        | Not available             | 117                                                                                                                             |
| 52       | sleeping wedge                                      | V6, TCEP                                                   | 2010                     | Michigan                        | Not available             | 117                                                                                                                             |
| 53       | sleeping wedge                                      | TCPP, TDCPP                                                | 2010                     | Michigan                        | Not available             | 117                                                                                                                             |
| 54       | portable mattress                                   | FM550/600                                                  | 2010                     | Michigan                        | Not available             | 117                                                                                                                             |
| 55       | sleeping wedge                                      | No Detects                                                 | 2010                     | Michigan                        | Not available             | 117                                                                                                                             |
| 56       | sleeping wedge                                      | Unidentified Peaks Present                                 | 2010                     | Michigan                        | Not available             | 117                                                                                                                             |
| 57       | sleeping wedge                                      | TCPP                                                       | 2010                     | Michigan                        | Not available             | 117                                                                                                                             |
| 58       | changing table pad                                  | U-OPFR, TCP                                                | 2010                     | Michigan                        | Not available             | 117                                                                                                                             |
| 59       | changing table pad                                  | TDCPP, TCPP, TCEP                                          | 2010                     | Michigan                        | Not available             | 117                                                                                                                             |
| 60       | changing table pad                                  | TDCPP, TCPP                                                | 2010                     | Michigan                        | Not available             | 117                                                                                                                             |
| 61       | portable crib/co-sleeper                            | TDCPP                                                      | 2008                     | Michigan                        | Not available             | no                                                                                                                              |
| 62       | car seat                                            | FM550/600                                                  | 2005                     | Michigan                        | Not available             | 117                                                                                                                             |
| 63       | portable crib/co-sleeper                            | TCPP                                                       | 2000                     | Michigan                        | Not available             | 117                                                                                                                             |
| 64       | changing table pad                                  | TDCPP, FM 550                                              | 2006                     | Michigan                        | Not available             | 116 and 117                                                                                                                     |
| 65       | Bumbo chair                                         | Unidentified Peaks Present                                 | 2006                     | Michigan                        | Not available             | no                                                                                                                              |
| 66       | sleeping wedge                                      | TDCPP                                                      | 2003                     | Not Available                   | Not available             | no                                                                                                                              |
| 67       | baby walker                                         | TDCPP                                                      | 2008                     | Alaska                          | Not available             | 116 and 117                                                                                                                     |
| 68       | Nursing pillow                                      | V6, TCEP                                                   | 2008                     | Washington                      | Not available             | 117                                                                                                                             |
| 69       | car seat                                            | FM550/600                                                  | 2004                     | New York                        | Not available             | 117                                                                                                                             |
| 70       | sleeping wedge                                      | Unidentified Peaks Present                                 | 2004                     | New York                        | Not available             | 117                                                                                                                             |
| 71       | glider rocker                                       | U-OPFR, TCP                                                | 2008                     | Vancouver BC                    | Not available             | 117                                                                                                                             |
| 72       | sleeping wedge                                      | No Detects                                                 | 2007                     | California                      | Not available             | 603                                                                                                                             |
| 73       | infant bath sling                                   | TDCPP, TCEP                                                | 2002-2004                | Nevada                          | yes                       | no                                                                                                                              |
| 74       | infant bath sling                                   | V6, TCEP                                                   | 2006                     | Nevada                          | no                        | 116 and 117                                                                                                                     |
| 75       | nursing pillow                                      | V6, TCEP                                                   | 2007                     | Maine                           | Not available             | 117                                                                                                                             |
| 76       | bassinnet mattress                                  | Unidentified Peaks Present                                 | 2006                     | Maine                           | Not available             | 603                                                                                                                             |
| 77       | booster seat (car seat?)                            | TDCPP                                                      | 2006                     | Maryland                        | Not available             | 117                                                                                                                             |
| 78       | car seat                                            | TDCPP                                                      | 2002                     | Washington                      | Not available             | no                                                                                                                              |
| 79       | portable mattress?                                  | U-OPFR, TCP                                                | 2007                     | Washington                      | Not available             | no                                                                                                                              |
| 80       | car seat                                            | TDCPP                                                      | 2009                     | Washington                      | Not available             | no                                                                                                                              |
| 81       | nursing pillow                                      | V6, TCEP                                                   | 2003                     | Data not available              | Not available             | only the resilient filling materials contained in this article meet the CA Bureau of Home Furnishings flammability requirements |
| 82       | changing table pad                                  | TDCPP                                                      | Not available            | Data not available              | Not available             | only the resilient filling materials contained in this article meet the CA Bureau of Home Furnishings flammability requirements |
| 83       | sleeping wedge                                      | TDCPP                                                      | 2003                     | Data not available              | Not available             | 117                                                                                                                             |
| 84       | car seat                                            | TDCPP                                                      | 2005                     | Data not available              | Not available             | Not available                                                                                                                   |
| 85       | high chair cover                                    | Unidentified Peaks Present                                 | 2007                     | Data not available              | Not available             | no                                                                                                                              |
| 86       | changing table pad                                  | FM550/600                                                  | 2009                     | Data not available              | Not available             | 117                                                                                                                             |
| 87       | Car Seat                                            | TCPP and Unidentified Peaks Present                        | 2010                     | North Carolina                  | no                        | no                                                                                                                              |
| 88       | nap mat                                             | Unidentified Peaks Present                                 | 2004                     | Data not available              | Not available             | no                                                                                                                              |
| 89       | baby sleep positioner                               | Unidentified Peaks Present                                 | 2009                     | Data not available              | Not available             | 117                                                                                                                             |

|     |                           |                            |                |                    |               |               |
|-----|---------------------------|----------------------------|----------------|--------------------|---------------|---------------|
| 90  | booster seat (car seat)   | FM550/600                  | 2009           | Data not available | Not available | no            |
| 91  | high chair back pad       | TDCPP                      | 2004           | Data not available | Not available | 117           |
| 92  | carseat                   | FM550/600                  | Not available  | Data not available | Not available | Not available |
| 93  | nursing pillow            | VE, TCPE                   | Not available  | Data not available | Not available | Not available |
| 94  | sleeping wedge            | low TDCPP                  | Not available  | New York           | Not available | Not available |
| 95  | Rocker                    | PentabDE                   | 2003           | Data not available | Not available | Not available |
| 96  | Nursing pillow            | TDCPP, TCPP                | 2010           | Data not available | Not available | 117           |
| 97  | Car Seat Accessory Pillow | PentabDE                   | estimated 2004 | Data not available | Not available | no            |
| 98  | Carseat                   | FM550/600                  | estimated 2000 | Data not available | Not available | no            |
| 99  | Foam Ball Bath Toy        | No Detects                 | estimated 2000 | Data not available | Not available | no            |
| 100 | Toilet Seat               | Unidentified Peaks Present | Not available  | Data not available | Not available | no            |
| 101 | Changing table pad        | FM 550/600                 | 2005           | Data not available | Not available | 117           |
